# Supplementary material
Source: PubMed Central journal article supplement (PMC5534326)
Supplement: NIHMS845366-supplement-supplemental_fig_1.pdf [file NIHMS845366-supplement-supplemental_fig_1.pdf]

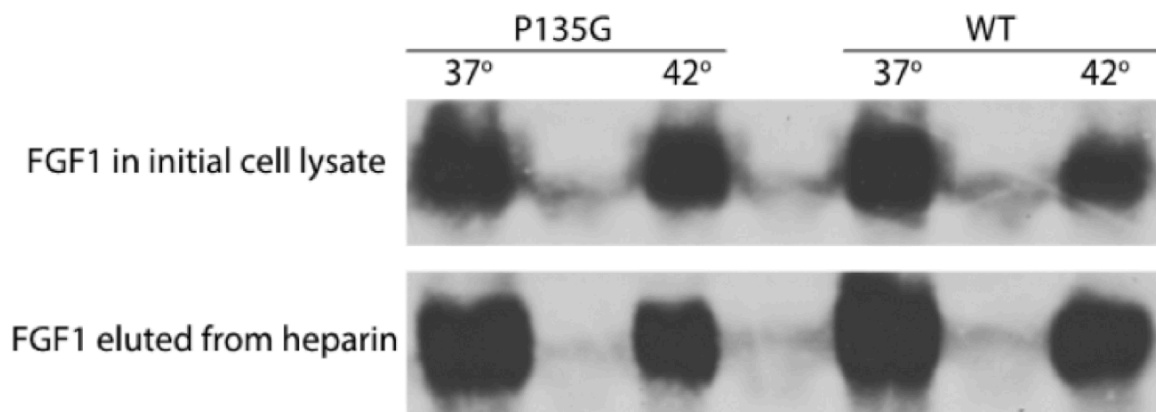

**Supplemental Figure 1.**

**P135G mutation does not interfere with FGF1 binding to heparin.** NIH 3T3 cells were adenovirally transduced with WT or P135G FGF1. Cells were submitted to 110 min incubation at 37°C or 42°C. FGF1 was isolated from cell lysates using heparin chromatography, resolved by SDS PAGE and detected using immunoblotting.
